# Supplementary material for: Cartilage Dysfunction in ALS Patients as Side Effect of Motion Loss: 3D Mechano-Electrochemical Computational Model
Source: Hindawi journal article supplement (doi:10.1155/2014/179070), 2014-01-01
Supplement: f1 [file 179070.f1.pdf]

## Weak formulation of mechano-electro-chemical cartilage model

### *Discretization and non-linear equations system*

For the temporal discretization of the governing equations, we consider the partition  $\cup_{n=1}^{n_{\text{step}}-1} [t_n, t_{n+1}]$  of the time interval of interest  $T$ , and focus on the typical time subinterval  $[t_n, t_{n+1}]$  with  $\Delta t = t_{n+1} - t_n \geq 0$  denoting the corresponding increment of time. It is assumed that the primary unknowns and all derivable quantities are known at time  $t_n$ . The generalized trapezoidal method is applied (Crank and Nicolson 1947), with  $\alpha \in (0,1]$ , such that  $t_{n+\alpha} = t_n + \alpha \Delta t$ . In this method the following scheme is used for the temporal discretization of primary variables (here only  $\varepsilon^w$  is shown, while  $\varepsilon^+$  and  $\varepsilon^-$  and  $\mathbf{u}$  have the same discretization):

$$\varepsilon_{n+1}^w = \varepsilon_n^w + \Delta t \dot{\varepsilon}_{n+\alpha}^w, \quad (\text{A.1})$$

$$\dot{\varepsilon}_{n+\alpha}^w = \dot{\varepsilon}_n^w (1 - \alpha) + \dot{\varepsilon}_{n+1}^w \alpha, \quad (\text{A.2})$$

where  $\varepsilon_{n+1}^w$ ,  $\dot{\varepsilon}_{n+\alpha}^w$  and  $\dot{\varepsilon}_{n+1}^w$  are approximations of  $\varepsilon^w(t_{n+1})$ ,  $(\frac{\partial \varepsilon^w}{\partial t})(t_{n+\alpha})$  and  $(\frac{\partial \varepsilon^w}{\partial t})(t_{n+1})$ , respectively. From a practical standpoint  $\tilde{\varepsilon}_{n+1}^w$  is introduced as a predictor value of  $\varepsilon_{n+1}^w$ , which only depends on magnitudes at time  $t_n$ :

$$\tilde{\varepsilon}_{n+1}^w = \varepsilon_n^w + (1 - \alpha)\Delta t \cdot \dot{\varepsilon}_n^w, \quad (\text{A.3})$$

$\dot{\varepsilon}_{n+1}^w$  can be computed by

$$\dot{\varepsilon}_{n+1}^w = \frac{\varepsilon_{n+1}^w - \tilde{\varepsilon}_{n+1}^w}{\alpha \Delta t}, \quad (\text{A.4})$$

Substitution of equations (A.3) and (A.4) in the weak form of the problem yields a semi-discrete set of equations that are discretized in time.

### *Spatial discretization of the problem*

The semi-discrete system is discretized in space using the finite element method. The domain  $\Omega$  is discretized into  $n_{el}$  elements  $\Omega^e$ , with  $\Omega = \cup_{e=1}^{n_{el}} \Omega^e$ . The primary unknown fields are interpolated within a generic element  $\Omega^e$  in terms of the nodal values through shape functions, that is,

$$\begin{aligned}
 \boldsymbol{\varepsilon}^{wh}|_{\Omega^e} &= \mathbf{N}_{\boldsymbol{\varepsilon}^w} \boldsymbol{\varepsilon}^{we}, \\
 \boldsymbol{\varepsilon}^{+h}|_{\Omega^e} &= \mathbf{N}_{\boldsymbol{\varepsilon}^+} \boldsymbol{\varepsilon}^{+e}, \\
 \boldsymbol{\varepsilon}^{-h}|_{\Omega^e} &= \mathbf{N}_{\boldsymbol{\varepsilon}^-} \boldsymbol{\varepsilon}^{-e}, \\
 \mathbf{u}^h|_{\Omega^e} &= \mathbf{N}_{\mathbf{u}} \mathbf{u}^e,
 \end{aligned} \tag{A.5}$$

where  $\boldsymbol{\varepsilon}^{we}$ ,  $\boldsymbol{\varepsilon}^{+e}$ ,  $\boldsymbol{\varepsilon}^{-e}$  and  $\mathbf{u}^e$  are column vectors of nodal values of the primary unknowns at element  $e$  and  $\mathbf{N}_{\boldsymbol{\varepsilon}^w}$ ,  $\mathbf{N}_{\boldsymbol{\varepsilon}^+}$ ,  $\mathbf{N}_{\boldsymbol{\varepsilon}^-}$  and  $\mathbf{N}_{\mathbf{u}}$  are matrices of element shape functions, that is,

$$\begin{aligned}
 \mathbf{N}_{\boldsymbol{\varepsilon}^w} &= [N_{\boldsymbol{\varepsilon}^w}^1, \dots, N_{\boldsymbol{\varepsilon}^w}^{n_{en}}], \\
 \mathbf{N}_{\boldsymbol{\varepsilon}^+} &= [N_{\boldsymbol{\varepsilon}^+}^1, \dots, N_{\boldsymbol{\varepsilon}^+}^{n_{en}}], \\
 \mathbf{N}_{\boldsymbol{\varepsilon}^-} &= [N_{\boldsymbol{\varepsilon}^-}^1, \dots, N_{\boldsymbol{\varepsilon}^-}^{n_{en}}], \\
 \mathbf{N}_{\mathbf{u}} &= \begin{bmatrix} N_u^1 & 0 & 0 \\ 0 & N_u^1 & 0 \\ 0 & 0 & N_u^1 \end{bmatrix} \dots \begin{bmatrix} N_u^{n_{en}} & 0 & 0 \\ 0 & N_u^{n_{en}} & 0 \\ 0 & 0 & N_u^{n_{en}} \end{bmatrix},
 \end{aligned} \tag{A.6}$$

where  $\mathbf{N}^i$  is the shape function associated with element node  $i$  and  $n_{\text{en}}$  is the number of element nodes. Following a Bubnov-Galerkin scheme, the same shape functions are also applied to interpolate the test functions:

$$\begin{aligned}\delta\boldsymbol{\varepsilon}^{wh}|_{\Omega^e} &= \mathbf{N}_{\varepsilon^w}\delta\boldsymbol{\varepsilon}^{we}, \\ \delta\boldsymbol{\varepsilon}^{+h}|_{\Omega^e} &= \mathbf{N}_{\varepsilon^+}\delta\boldsymbol{\varepsilon}^{+e}, \\ \delta\boldsymbol{\varepsilon}^{-h}|_{\Omega^e} &= \mathbf{N}_{\varepsilon^-}\delta\boldsymbol{\varepsilon}^{-e}, \\ \delta\mathbf{u}^h|_{\Omega^e} &= \mathbf{N}_u\delta\mathbf{u}^e.\end{aligned}\tag{A.7}$$

Likewise, the discretization of the related gradients of the test functions and the primary unknowns take the following element wise format:

$$\begin{aligned}\nabla\boldsymbol{\varepsilon}^{wh}|_{\Omega^e} = \nabla \cdot \mathbf{N}_{\varepsilon^w}\boldsymbol{\varepsilon}^{we} &\xrightarrow{\text{yields}} \nabla\delta\boldsymbol{\varepsilon}_h|_{\Omega^e} = \nabla \cdot \mathbf{N}_{\varepsilon^w}\delta\boldsymbol{\varepsilon}^{we}, \\ \nabla\boldsymbol{\varepsilon}^{+h}|_{\Omega^e} = \nabla \cdot \mathbf{N}_{\varepsilon^+}\boldsymbol{\varepsilon}^{+e} &\xrightarrow{\text{yields}} \nabla\delta\boldsymbol{\varepsilon}_h^+|_{\Omega^e} = \nabla \cdot \mathbf{N}_{\varepsilon^+}\delta\boldsymbol{\varepsilon}^{+e}, \\ \nabla\boldsymbol{\varepsilon}^{-h}|_{\Omega^e} = \nabla \cdot \mathbf{N}_{\varepsilon^-}\boldsymbol{\varepsilon}^{-e} &\xrightarrow{\text{yields}} \nabla\delta\boldsymbol{\varepsilon}_h^-|_{\Omega^e} = \nabla \cdot \mathbf{N}_{\varepsilon^-}\delta\boldsymbol{\varepsilon}^{-e}.\end{aligned}\tag{A.8}$$

The strains are interpolated in the following form:

$$\boldsymbol{\varepsilon}^h|_{\Omega^e} = \mathbf{B}_u\mathbf{u}^e,\tag{A.9}$$

where  $\mathbf{B}_u$  is a matrix of derivatives of shape functions:

$$\mathbf{B}_u = \mathbf{HN}_u,\tag{A.10}$$

$$\mathbf{H} = \begin{bmatrix} \frac{\partial}{\partial x} & 0 & 0 \\ 0 & \frac{\partial}{\partial y} & 0 \\ 0 & 0 & \frac{\partial}{\partial z} \\ \frac{1}{2} \frac{\partial}{\partial y} & \frac{1}{2} \frac{\partial}{\partial x} & 0 \\ \frac{1}{2} \frac{\partial}{\partial y} & 0 & \frac{1}{2} \frac{\partial}{\partial y} \\ 0 & \frac{1}{2} \frac{\partial}{\partial z} & \frac{1}{2} \frac{\partial}{\partial y} \end{bmatrix}. \quad (\text{A.11})$$

Substituting the equations (A.5), (A.7) and (A.10) into the semi-discrete system and choosing appropriately arbitrary coefficients  $\delta \boldsymbol{\varepsilon}^{w^e}$ ,  $\delta \boldsymbol{\varepsilon}^{+e}$ ,  $\delta \boldsymbol{\varepsilon}^{-e}$  and  $\delta \mathbf{u}^e$  of the test functions, one can finally arrive at a set of non-linear algebraic equations which is sufficient to determine the nodal values of the primary unknowns that can be written in the form:

$$\mathbf{F}^{\text{int}} = \left( \mathbb{Z}_{n+1}, \frac{\mathbb{Z}_{n+1} - \tilde{\mathbb{Z}}_{n+1}}{\alpha \Delta t} \right) = \mathbf{F}^{\text{ext}}(\mathbb{Z}_{n+1}), \quad (\text{A.12})$$

where  $\mathbb{Z}_{n+1}$  and  $\tilde{\mathbb{Z}}_{n+1}$  are the global column vector of nodal values of the primary unknown fields at time  $t_{n+1}$  and the corresponding predictor value, respectively. This vector can be obtained as follow:

$$\mathbb{Z}_{n+1} = \mathcal{R}_{e=1}^{n_{\text{en}}} \mathbf{d}_{n+1}^e, \quad (\text{A.13})$$

$$\tilde{\mathbb{Z}}_{n+1} = \mathcal{R}_{e=1}^{n_{\text{en}}} \tilde{\mathbf{d}}_{n+1}^e, \quad (\text{A.14})$$

where  $\mathcal{R}$  denotes the standard finite element assembly operator and  $\mathbf{d}_{n+1}^e$  and  $\tilde{\mathbf{d}}_{n+1}^e$  can be defined by

$$\mathbf{d}_{n+1}^e = [\boldsymbol{\varepsilon}_{n+1}^{w^e}, \boldsymbol{\varepsilon}_{n+1}^{+e}, \boldsymbol{\varepsilon}_{n+1}^{-e}, \mathbf{u}_{n+1}^e]^T, \quad (\text{A.15})$$

$$\tilde{\mathbf{d}}_{n+1}^e = [\tilde{\boldsymbol{\varepsilon}}_{n+1}^{w^e}, \tilde{\boldsymbol{\varepsilon}}_{n+1}^{+e}, \tilde{\boldsymbol{\varepsilon}}_{n+1}^{-e}, \tilde{\mathbf{u}}_{n+1}^e]^T. \quad (\text{A.16})$$

The internal and external global force vector represented by  $F^{int}$  and  $F^{ext}$  also come from the assembly of element contributions:

$$F_{n+1}^{int} = \mathcal{R}_{e=1}^{nen} \mathbf{f}_{n+1}^{int,e}, \quad (\text{A.17})$$

$$F_{n+1}^{ext} = \mathcal{R}_{e=1}^{nen} \mathbf{f}_{n+1}^{ext,e}, \quad (\text{A.18})$$

where

$$\mathbf{f}_{n+1}^{int,e} = [\mathbf{f}_{\varepsilon^w, n+1}^{int,e}; \mathbf{f}_{\varepsilon^+, n+1}^{int,e}; \mathbf{f}_{\varepsilon^-, n+1}^{int,e}; \mathbf{f}_{u, n+1}^{int,e}]^T, \quad (\text{A.19})$$

$$\mathbf{f}_{n+1}^{ext,e} = [\mathbf{f}_{\varepsilon^w, n+1}^{ext,e}; \mathbf{f}_{\varepsilon^+, n+1}^{ext,e}; \mathbf{f}_{\varepsilon^-, n+1}^{ext,e}; \mathbf{f}_{u, n+1}^{ext,e}]^T. \quad (\text{A.20})$$

The element contributions to the internal force reads as:

$$\mathbf{f}_{\varepsilon^w, n+1}^{int,e} = \int \nabla \cdot \mathbf{N}_{\varepsilon^w}^T \left[ \frac{\mathbf{u}_{n+1}^h - \tilde{\mathbf{u}}_{n+1}^h}{\alpha \Delta t} + \frac{RT}{\alpha} \Phi^w \nabla \varepsilon^w + \frac{RT}{\alpha} \Phi^w \frac{c^+}{\varepsilon^{+h}} \nabla \varepsilon^{+h} + \frac{RT}{\alpha} \Phi^w \frac{c^-}{\varepsilon^{-h}} \nabla \varepsilon^{-h} \right]_{n+1} dV,$$

$$\mathbf{f}_{\varepsilon^+, n+1}^{int,e} = \int_{\Omega} \nabla \cdot \mathbf{N}_{\varepsilon^+}^T \left[ -\frac{RT}{\alpha} \Phi^w c^F \nabla \cdot \mathbf{N}_{\varepsilon^w} \varepsilon^w - \left( \frac{\Phi^w c^{+D^+}}{\varepsilon^{+h}} + \frac{RT}{\alpha} \Phi^w \frac{(c^+)^2}{\varepsilon^{+h}} - \frac{RT}{\alpha} \Phi^w \frac{c^+ c^-}{\varepsilon^{+h}} \right) \nabla \varepsilon^{+h} + \left( \frac{\Phi^w c^{-D^-}}{\varepsilon^{-h}} + \frac{RT}{\alpha} \Phi^w \frac{(c^-)^2}{\varepsilon^{-h}} - \frac{RT}{\alpha} \Phi^w \frac{c^+ c^-}{\varepsilon^{-h}} \right) \nabla \varepsilon^{-h} \right]_{n+1} dV,$$

(A.21)

$$\mathbf{f}_{\varepsilon^-, n+1}^{int,e} = \int_{\Omega} \nabla \cdot \mathbf{N}_{\varepsilon^-}^T \left[ -\frac{RT}{\alpha} \Phi^w c^F \nabla \cdot \mathbf{N}_{\varepsilon^w} \varepsilon^w + \left( \frac{\Phi^w c^{+D^+}}{\varepsilon^{+h}} + \frac{RT}{\alpha} \Phi^w \frac{(c^+)^2}{\varepsilon^{+h}} + \frac{RT}{\alpha} \Phi^w \frac{c^+ c^-}{\varepsilon^{+h}} \right) \nabla \varepsilon^{+h} + \left( \frac{\Phi^w c^{-D^-}}{\varepsilon^{-h}} + \frac{RT}{\alpha} \Phi^w \frac{(c^-)^2}{\varepsilon^{-h}} - \frac{RT}{\alpha} \Phi^w \frac{c^+ c^-}{\varepsilon^{-h}} \right) \nabla \varepsilon^{-h} \right]_{n+1} dV,$$

$$\left( \frac{\Phi^w c^- D^-}{\varepsilon^{-h}} + \frac{RT}{\alpha} \Phi^w \frac{(c^-)^2}{\varepsilon^{-h}} + \frac{RT}{\alpha} \Phi^w \frac{c^+ c^-}{\varepsilon^{-h}} \right) \nabla \varepsilon^{-h} \Big]_{n+1} dV +$$

$$\int \nabla \cdot \mathbf{N}_{\varepsilon^-}^T \left( \Phi^w c^{kh} \frac{\mathbf{u}_{n+1}^h - \tilde{\mathbf{u}}_{n+1}^h}{\alpha \Delta t} \right) dV + \int \mathbf{N}_{\varepsilon^-}^T \left( \Phi^w \frac{c_{n+1}^{kh} - \tilde{c}_{n+1}^{kh}}{\alpha \Delta t} \right) dV,$$

$$\mathbf{f}_{\mathbf{u},n+1}^{int,e} = \int \mathbf{B}_{\mathbf{u}}^T \left[ \mathbf{D}_{elas} \mathbf{H} \mathbf{u}^h - RT \varepsilon^{wh} \mathbf{I} + RT \Phi c^{kh} \mathbf{I} - B_w \mathbf{H} \mathbf{u}^h \right]_{n+1} dV,$$

where  $\mathbf{D}_{elas}$  is the elastic constitutive matrix:

$$D_{elas} = \xi \begin{bmatrix} 1-\nu & \nu & \nu & & & \\ \nu & 1-\nu & \nu & & & \\ \nu & \nu & 1-\nu & & & \\ & & & \frac{1-2\nu}{2} & 0 & 0 \\ & & & 0 & \frac{1-2\nu}{2} & 0 \\ & & & 0 & 0 & \frac{1-2\nu}{2} \end{bmatrix}, \quad (\text{A.22})$$

$$\text{with } \xi = \frac{E}{(1+\nu)(1-2\nu)}.$$

In the case of the external force vector the element contributions have the following expressions:

$$\mathbf{f}_{\mathbf{u},n+1}^{ext,e} = \int \mathbf{N}_{\mathbf{u}}^T \boldsymbol{\sigma}_{n+1}^{*h} dV,$$

$$\mathbf{f}_{\varepsilon^w,n+1}^{ext,e} = - \int \mathbf{N}_{\varepsilon^w}^T \mathbf{J}_{n+1}^{*h} dV, \quad (\text{A.23})$$

$$\mathbf{f}_{\varepsilon^+,n+1}^{ext,e} = \int \mathbf{N}_{\varepsilon^+}^T (\mathbf{J}_{n+1}^{+*h} - \mathbf{J}_{n+1}^{-*h}) dV,$$

$$\mathbf{f}_{\varepsilon^-,n+1}^{ext,e} = - \int \mathbf{N}_{\varepsilon^+}^T (\mathbf{J}_{n+1}^{+*h} + \mathbf{J}_{n+1}^{-*h}) dV.$$
